# Supplementary material
Source: PubMed Central journal article supplement (PMC2533415)
Supplement: supp_M800194-JLR200_Aberg_Suppl_M8_00194-JLR_rev1.pdf [file supp_M800194-JLR200_Aberg_Suppl_M8_00194-JLR_rev1.pdf]

**Supplementary material to:**

**A Genome-Wide Linkage Scan Identifies Multiple Chromosomal Regions**

**Influencing Serum Lipid Levels in the Population on the Samoan Islands**

Karolina Åberg<sup>1</sup>, Feng Dai<sup>2†</sup>, Guangyun Sun<sup>3</sup>, Ember Keighley<sup>4</sup>, Subba Rao Indugula<sup>3</sup>, Linda Bausserman<sup>4</sup>, Satupaitea Viali<sup>5</sup>, John Tuitele<sup>6</sup>, Ranjan Deka<sup>3</sup>, Daniel E. Weeks<sup>1,2</sup>, Stephen T. McGarvey<sup>4</sup>

<sup>1</sup>Department of Human Genetics, Graduate School of Public Health, University of Pittsburgh, Pittsburgh, PA; <sup>2</sup>Department of Biostatistics, Graduate School of Public Health, University of Pittsburgh, Pittsburgh, PA; <sup>3</sup>Center for Genome Information, Department of Environmental Health, University of Cincinnati, Cincinnati, OH; <sup>4</sup>International Health Institute, Brown University, Providence, RI; <sup>5</sup>Ministry of Health, Apia, Samoa; <sup>6</sup>Department of Health, Pago Pago, American Samoa.

† Now at Department of Anesthesiology, School of Medicine, University of Pittsburgh, Pittsburgh, PA

Correspondence to:  
Dr. Stephen T. McGarvey, PhD, MPH  
Professor of Community Health and Anthropology  
Director, International Health Institute  
Brown University  
Box G- S2  
169 Angell Street, Room 200  
Providence, RI 02912  
phone: 401-863-1354  
fax: 401-863-1243  
email: [Stephen\\_McGarvey@brown.edu](mailto:Stephen_McGarvey@brown.edu)

## SUPPLEMENTARY MATERIAL TABLE

Table S1. Description of the pedigrees included in the three study samples.

| Pedigree        | Number | Number of<br>of Gene-<br>Individuals in<br>Pedigree | <u>Am. Samoa</u> |                | <u>Samoa</u>    |                | <u>Combined</u> |                |
|-----------------|--------|-----------------------------------------------------|------------------|----------------|-----------------|----------------|-----------------|----------------|
|                 |        |                                                     | Pheno-<br>typed  | Geno-<br>typed | Pheno-<br>typed | Geno-<br>typed | Pheno-<br>typed | Geno-<br>typed |
| 1 <sup>t</sup>  | 8      | 719 *                                               | 206              | 197            | 49              | 42             | 255             | 239            |
| 2               | 7      | 553 *                                               | 211              | 208            | 12              | 9              | 223             | 217            |
| 3               | 7      | 127 *                                               | 14               | 14             | 37              | 34             | 51              | 48             |
| 4               | 4      | 96 *                                                | 26               | 25             | 33              | 27             | 59              | 52             |
| 5               | 5      | 78 *                                                | 8                | 8              | 26              | 22             | 34              | 30             |
| 6               | 6      | 74 *                                                | 1                | 1              | 20              | 18             | 21              | 19             |
| 7               | 5      | 59 *                                                | 1                | 1              | 26              | 24             | 27              | 25             |
| 8               | 5      | 58                                                  | 0                | 0              | 26              | 21             | 26              | 21             |
| 9               | 5      | 57                                                  | 0                | 0              | 20              | 16             | 20              | 16             |
| 10              | 4      | 57 *                                                | 1                | 1              | 28              | 28             | 29              | 29             |
| 11              | 6      | 57 *                                                | 1                | 1              | 16              | 15             | 17              | 16             |
| 12              | 5      | 55 *                                                | 4                | 4              | 30              | 27             | 34              | 31             |
| 13              | 5      | 53                                                  | 0                | 0              | 26              | 21             | 26              | 21             |
| 14 <sup>t</sup> | 7      | 52                                                  | 0                | 0              | 18              | 16             | 18              | 16             |
| 15              | 6      | 47 *                                                | 4                | 4              | 17              | 14             | 21              | 18             |
| 16              | 5      | 47                                                  | 0                | 0              | 24              | 17             | 24              | 17             |
| 17              | 7      | 44                                                  | 0                | 0              | 13              | 11             | 13              | 11             |
| 18              | 5      | 43                                                  | 0                | 0              | 24              | 21             | 24              | 21             |
| 19              | 4      | 43                                                  | 0                | 0              | 20              | 16             | 20              | 16             |
| 20              | 5      | 40                                                  | 0                | 0              | 12              | 10             | 12              | 10             |
| 21              | 4      | 39 *                                                | 1                | 1              | 14              | 13             | 15              | 14             |
| 22              | 4      | 37 *                                                | 1                | 1              | 23              | 24             | 24              | 25             |
| 23              | 4      | 36 *                                                | 4                | 4              | 13              | 13             | 17              | 17             |
| 24              | 4      | 36                                                  | 0                | 0              | 22              | 16             | 22              | 16             |
| 25              | 5      | 28                                                  | 0                | 0              | 8               | 7              | 8               | 7              |
| 26              | 5      | 26 *                                                | 1                | 1              | 13              | 13             | 14              | 14             |
| 27              | 5      | 26                                                  | 6                | 6              | 0               | 0              | 6               | 6              |
| 28              | 4      | 22                                                  | 0                | 0              | 11              | 9              | 11              | 9              |
| 29              | 5      | 22                                                  | 8                | 8              | 0               | 0              | 8               | 8              |
| 30              | 3      | 20 *                                                | 4                | 4              | 5               | 4              | 9               | 8              |
| 31              | 3      | 19                                                  | 0                | 0              | 10              | 7              | 10              | 7              |
| 32 <sup>t</sup> | 4      | 19                                                  | 7                | 7              | 0               | 0              | 7               | 7              |
| 33              | 4      | 18                                                  | 0                | 0              | 9               | 6              | 9               | 6              |
| 34              | 4      | 18                                                  | 0                | 0              | 8               | 6              | 8               | 6              |
| 35              | 5      | 16                                                  | 0                | 0              | 4               | 2              | 4               | 2              |
| 36              | 4      | 15                                                  | 0                | 0              | 4               | 4              | 4               | 4              |
| 37              | 3      | 14 *                                                | 1                | 1              | 8               | 7              | 9               | 8              |
| 38              | 3      | 14                                                  | 10               | 11             | 0               | 0              | 10              | 11             |

|    |   |      |   |   |   |   |   |   |
|----|---|------|---|---|---|---|---|---|
| 39 | 4 | 13   | 5 | 5 | 0 | 0 | 5 | 5 |
| 40 | 4 | 13   | 5 | 5 | 0 | 0 | 5 | 5 |
| 41 | 3 | 13   | 9 | 9 | 0 | 0 | 9 | 9 |
| 42 | 4 | 12   | 0 | 0 | 3 | 3 | 3 | 3 |
| 43 | 4 | 12   | 0 | 0 | 6 | 5 | 6 | 5 |
| 44 | 3 | 11 * | 1 | 1 | 5 | 3 | 6 | 4 |
| 45 | 4 | 10   | 0 | 0 | 6 | 3 | 6 | 3 |
| 46 | 3 | 10   | 3 | 4 | 0 | 0 | 3 | 4 |
| 47 | 4 | 10   | 4 | 4 | 0 | 0 | 4 | 4 |
| 48 | 3 | 9    | 0 | 0 | 3 | 3 | 3 | 3 |
| 49 | 3 | 9 *  | 3 | 3 | 3 | 2 | 6 | 5 |
| 50 | 3 | 9    | 5 | 5 | 0 | 0 | 5 | 5 |
| 51 | 3 | 8    | 4 | 4 | 0 | 0 | 4 | 4 |
| 52 | 3 | 8    | 2 | 2 | 0 | 0 | 2 | 2 |
| 53 | 3 | 8    | 2 | 2 | 0 | 0 | 2 | 2 |
| 54 | 3 | 7    | 4 | 4 | 0 | 0 | 4 | 4 |
| 55 | 3 | 7    | 2 | 2 | 0 | 0 | 2 | 2 |
| 56 | 3 | 7    | 4 | 4 | 0 | 0 | 4 | 4 |
| 57 | 3 | 6    | 2 | 2 | 0 | 0 | 2 | 2 |
| 58 | 2 | 5    | 2 | 2 | 0 | 0 | 2 | 2 |
| 59 | 2 | 5    | 4 | 4 | 0 | 0 | 4 | 4 |
| 60 | 2 | 5    | 0 | 0 | 3 | 3 | 3 | 3 |
| 61 | 2 | 4    | 0 | 0 | 3 | 3 | 3 | 3 |
| 62 | 2 | 4 *  | 1 | 1 | 1 | 1 | 2 | 2 |
| 63 | 2 | 4    | 2 | 2 | 0 | 0 | 2 | 2 |
| 64 | 2 | 4    | 2 | 2 | 0 | 0 | 2 | 2 |
| 65 | 2 | 4    | 2 | 2 | 0 | 0 | 2 | 2 |
| 66 | 2 | 3    | 0 | 0 | 2 | 2 | 2 | 2 |
| 67 | 2 | 3    | 0 | 0 | 2 | 2 | 2 | 2 |
| 68 | 2 | 3    | 0 | 0 | 2 | 2 | 2 | 2 |
| 69 | 2 | 3    | 0 | 0 | 2 | 2 | 2 | 2 |
| 70 | 2 | 3    | 2 | 2 | 0 | 0 | 2 | 2 |
| 71 | 2 | 3    | 3 | 3 | 0 | 0 | 3 | 3 |

Note that the exact number of successfully genotyped markers and phenotyped traits may shift for different markers and different traits. To be included in the study sample a family had to have at least two genotyped family members. \*Indicates that the pedigree structure includes individuals from both the Am. Samoa and the Samoa study sample. † Three families include monozygotic twins of which one individual per pair was removed prior to statistical analysis.

## SUPPLEMENTARY MATERIAL FIGURE LEGENDS

**Figure S1** Distribution of covariates and traits in American Samoa and Samoa.

**Figure S2.** Genome-wide linkage results from American Samoa (left column), Samoa (middle column) and for the combined study sample (right column) are shown when **a)** the initial covariate set was screened for. **b)** BMI in addition to all other covariates were screened for. For the X chromosome the model including the X-linked polygenic VC is shown.

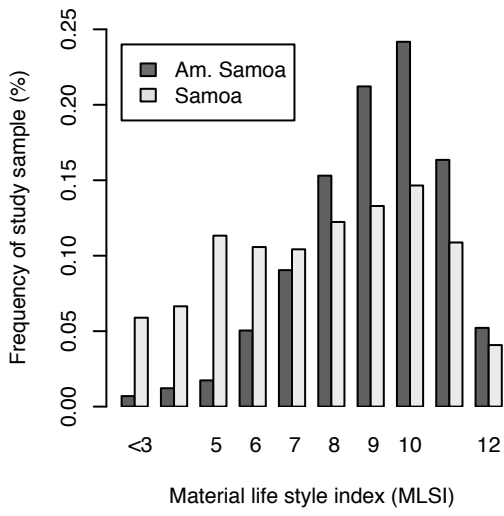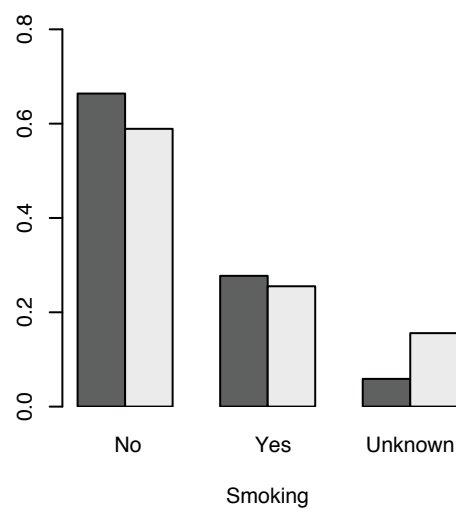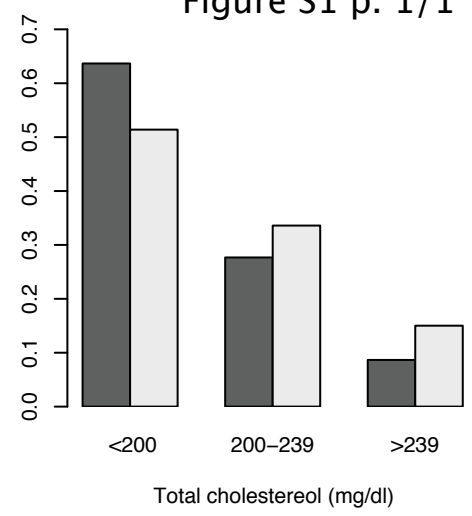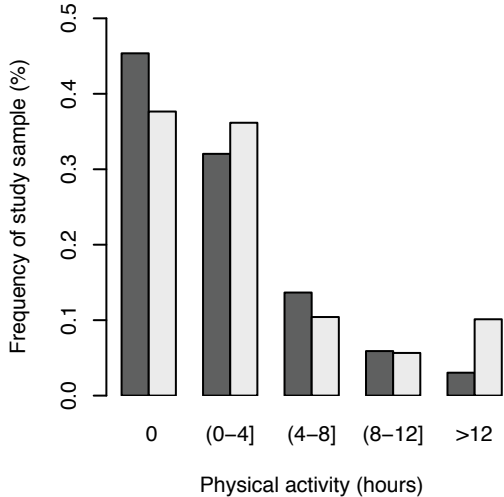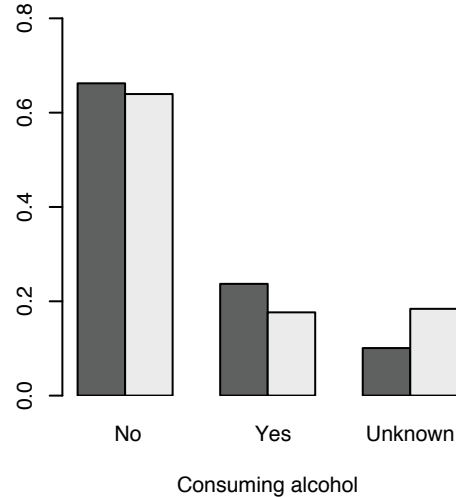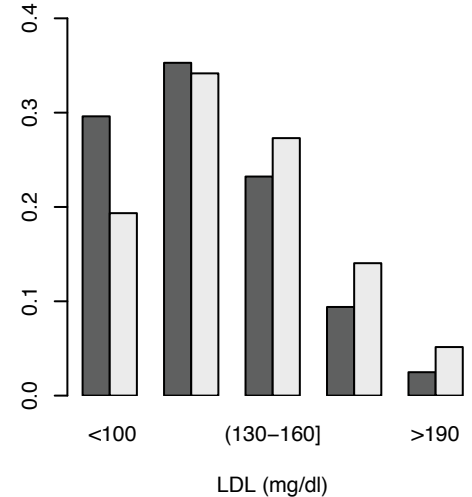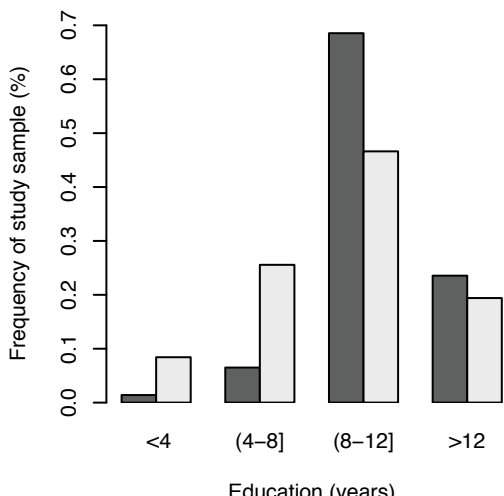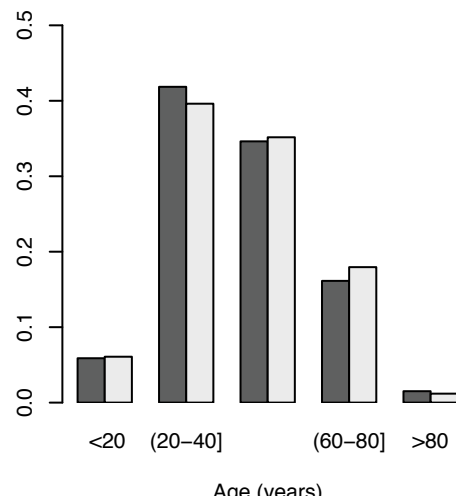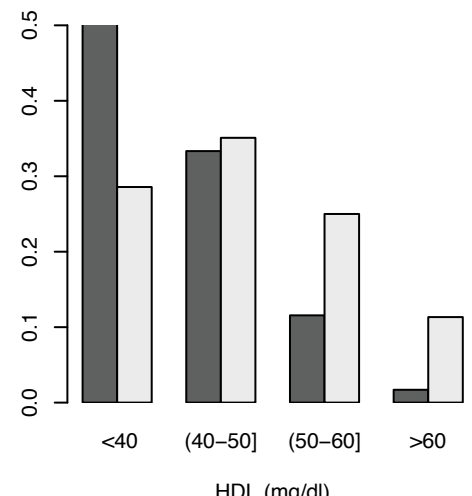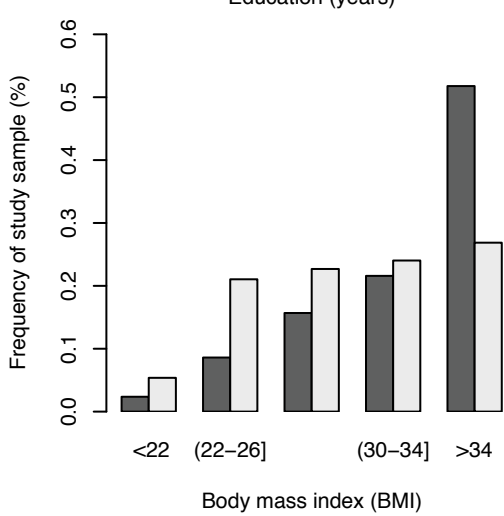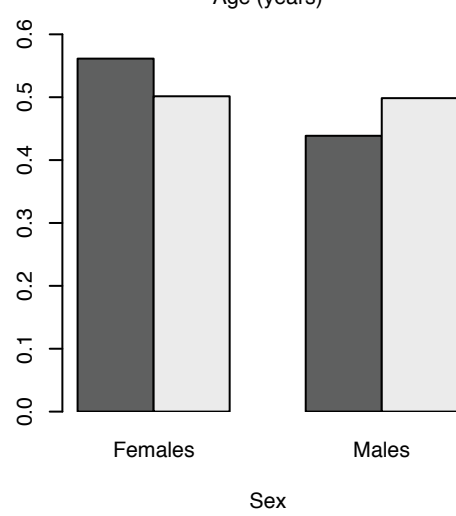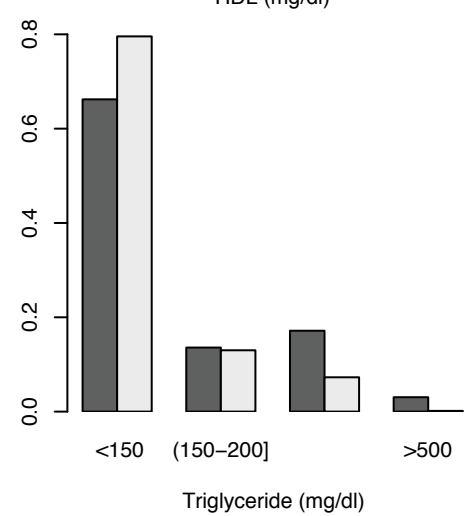

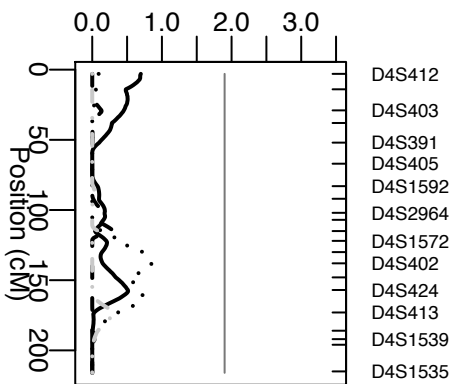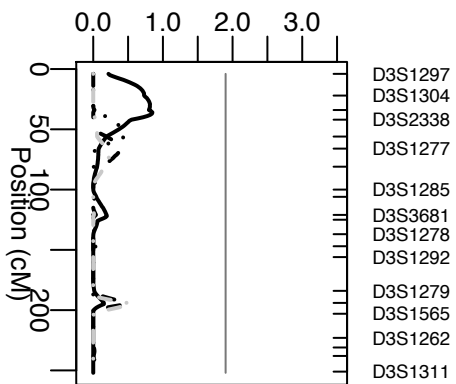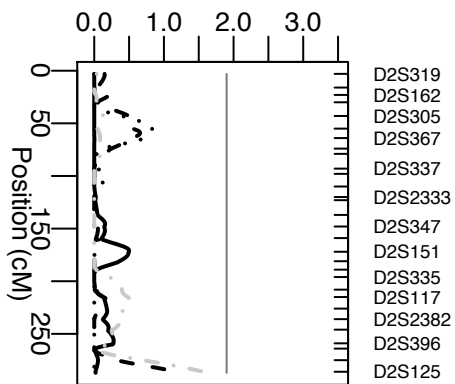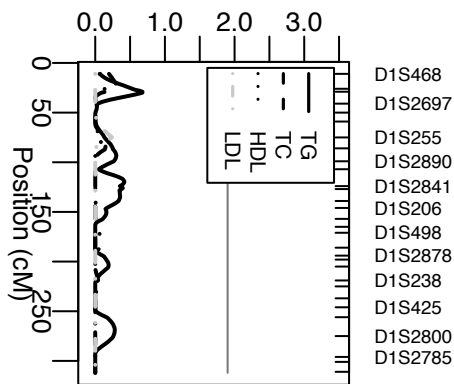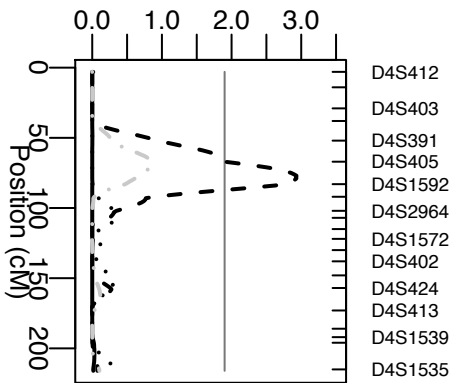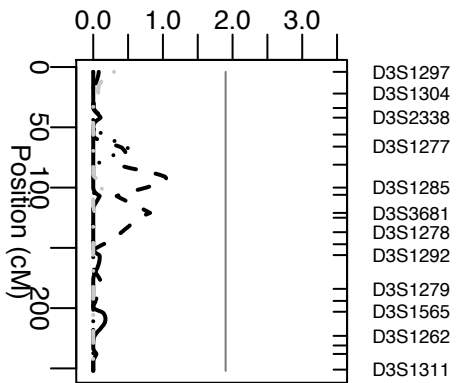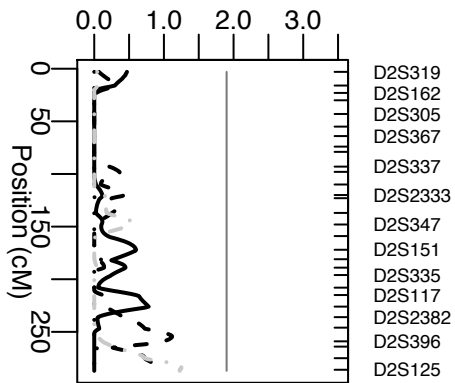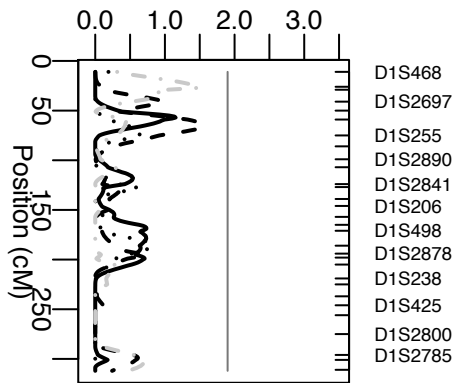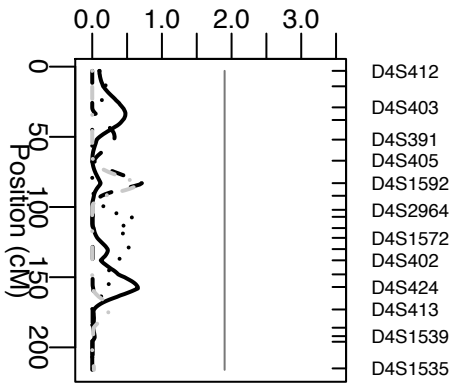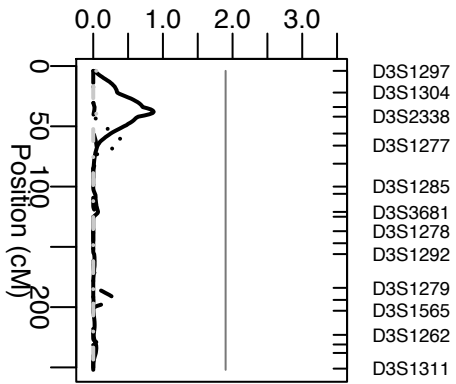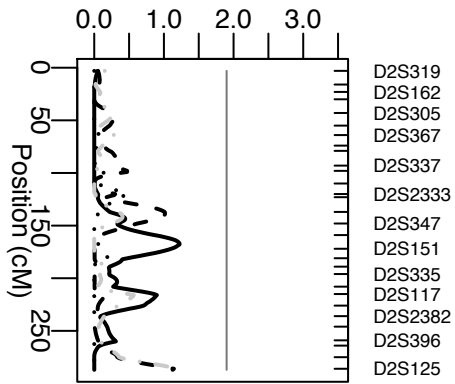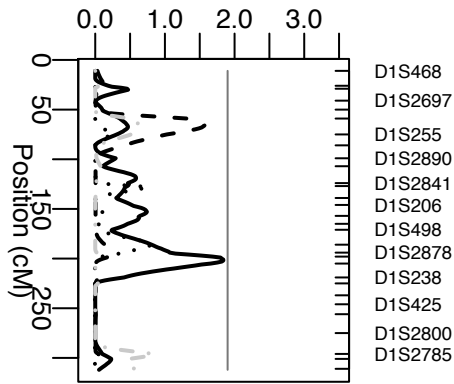

Figure S2a p. 1/6

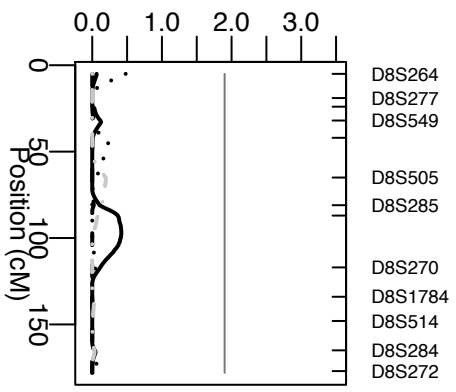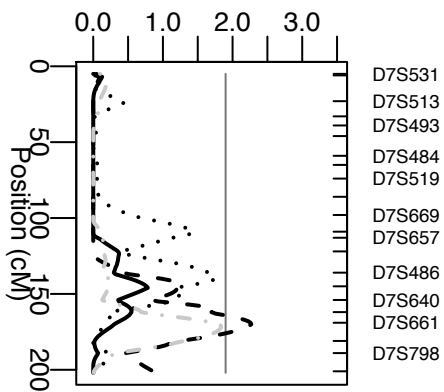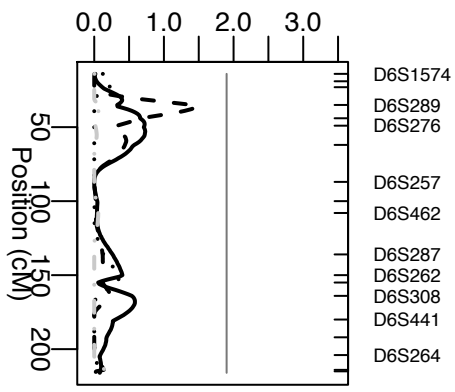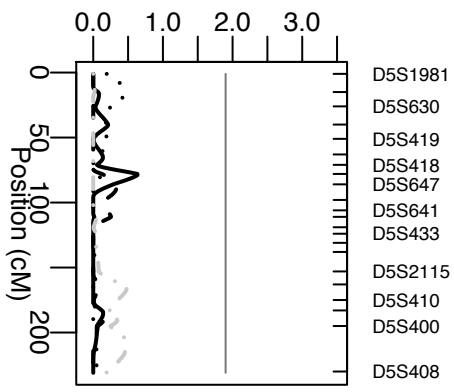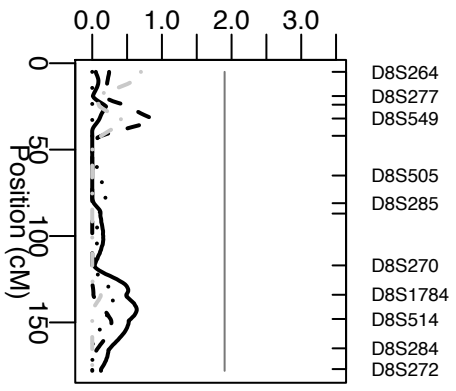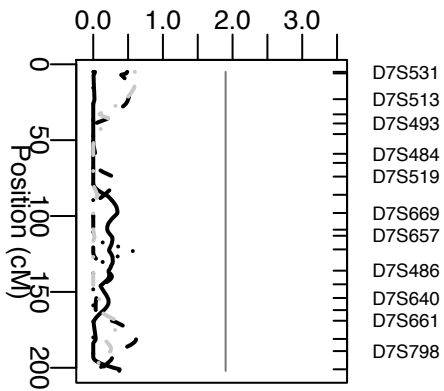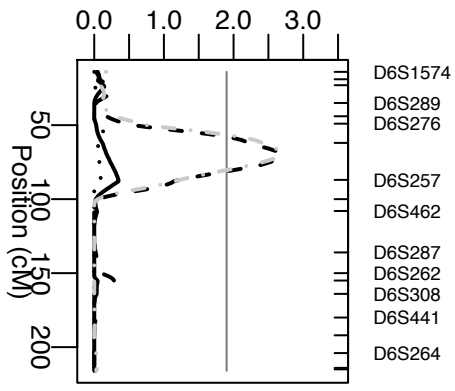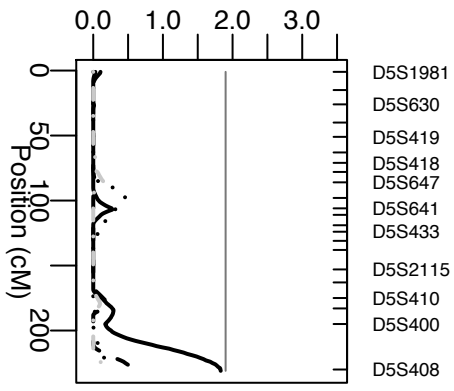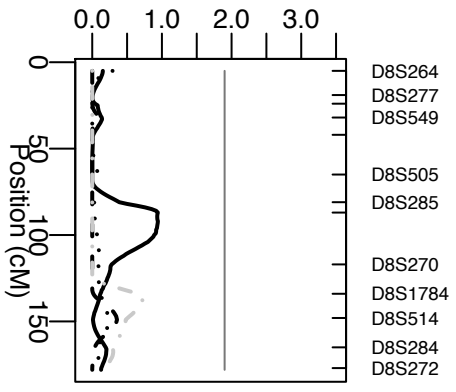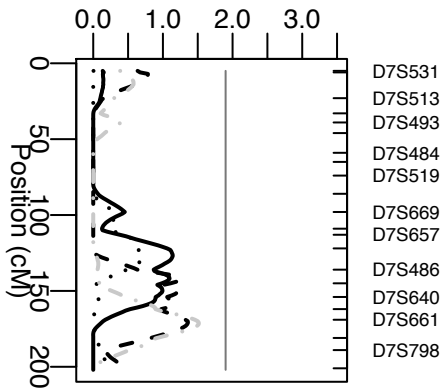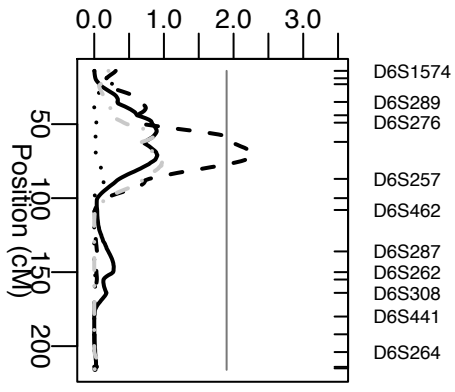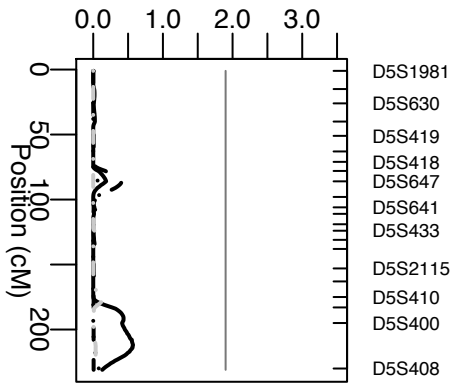

Figure S2a p. 2/6

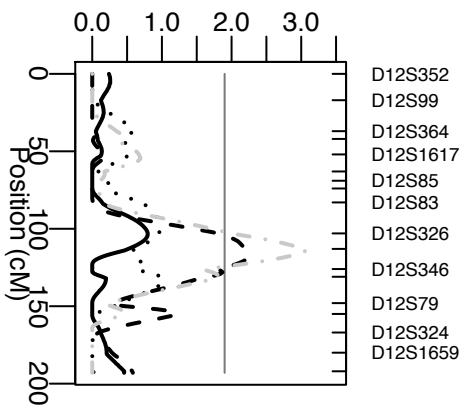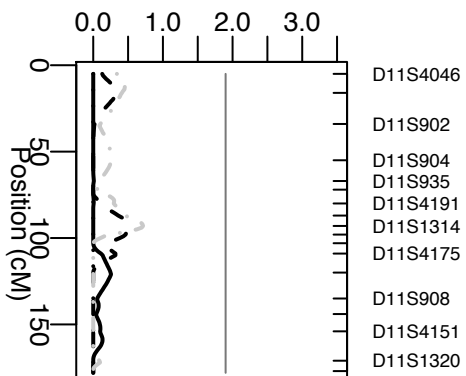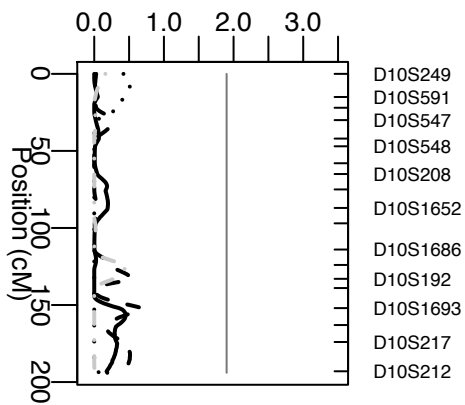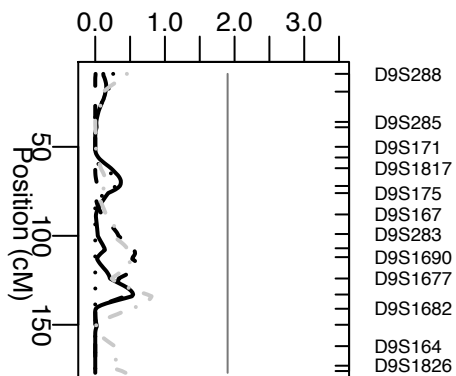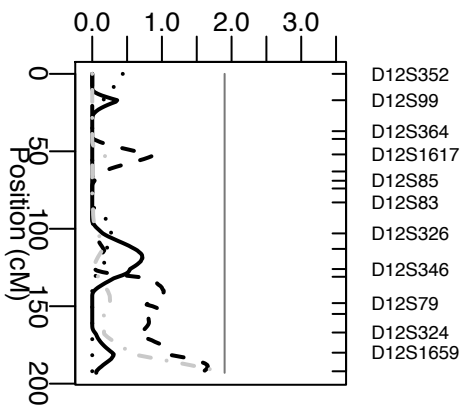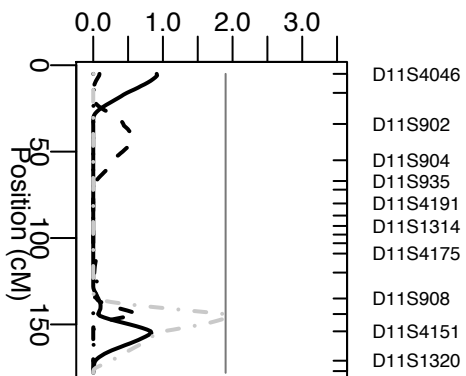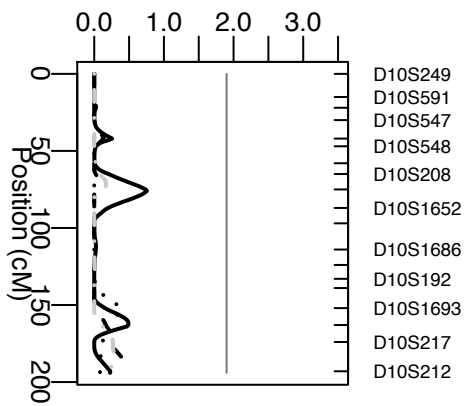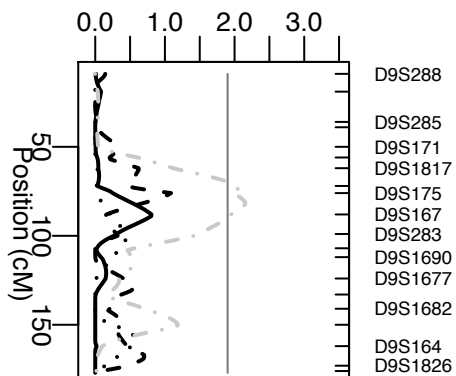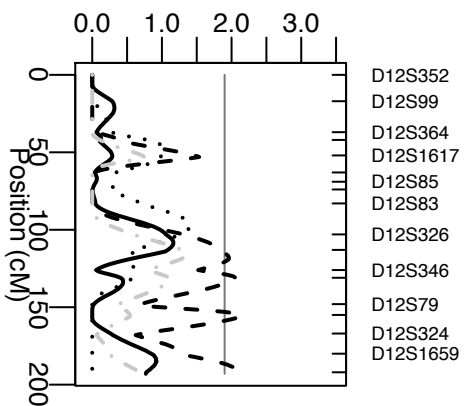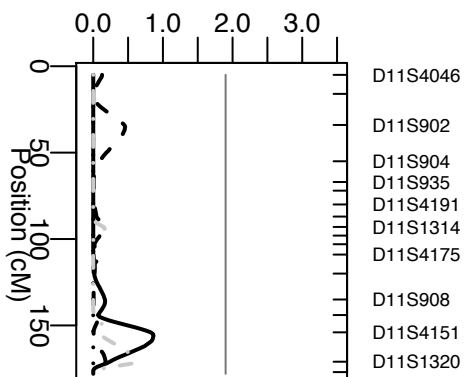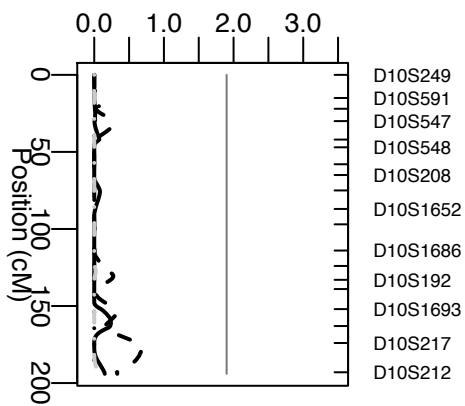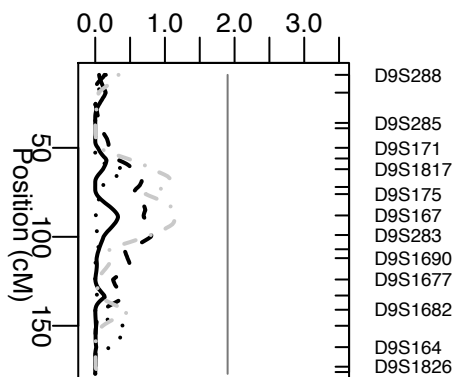

Figure S2a p. 3/6



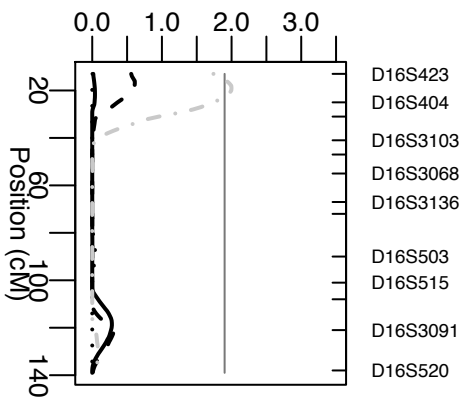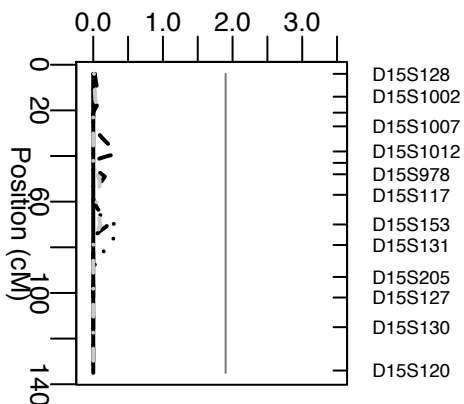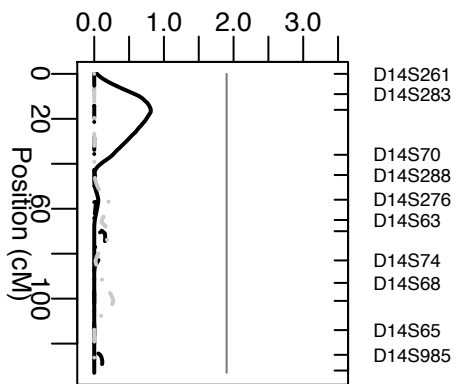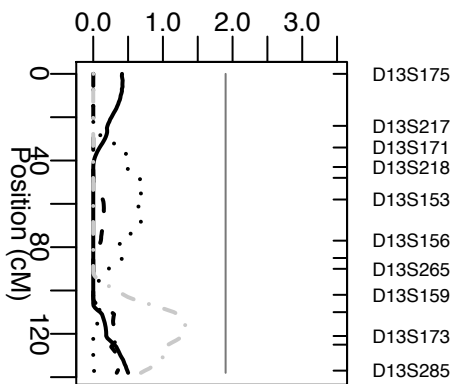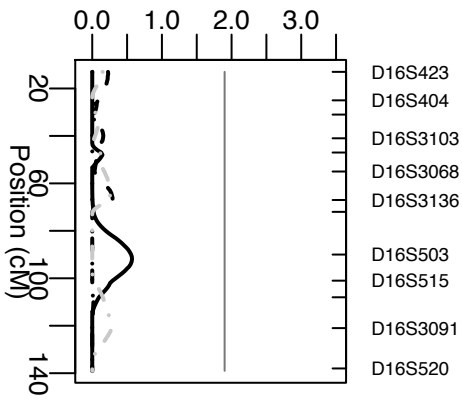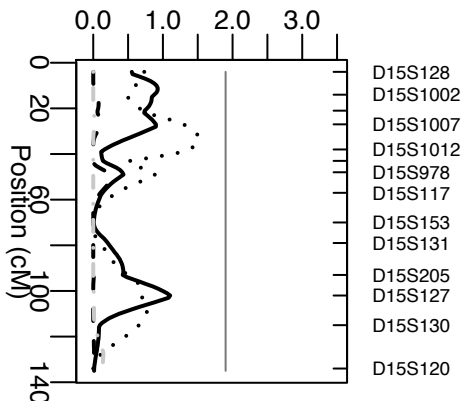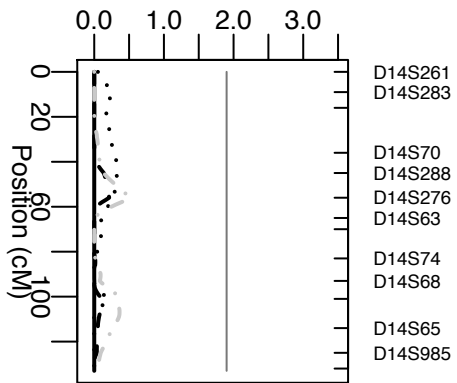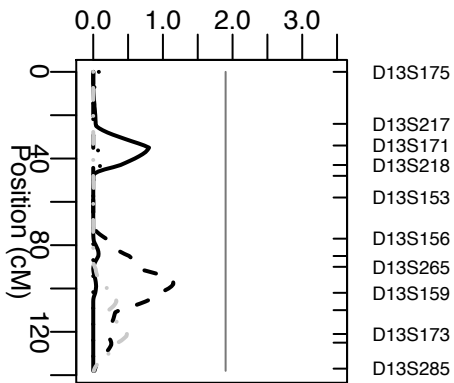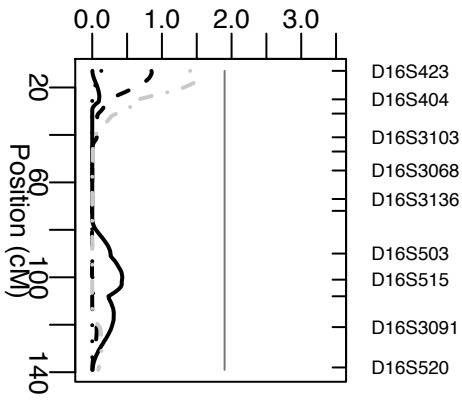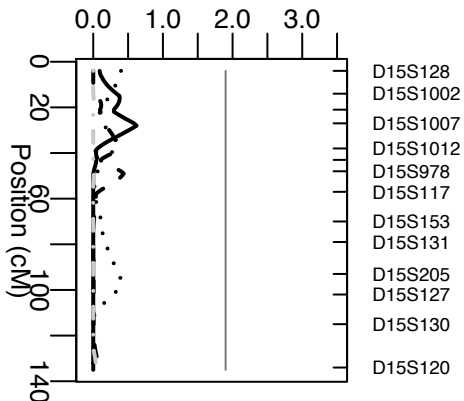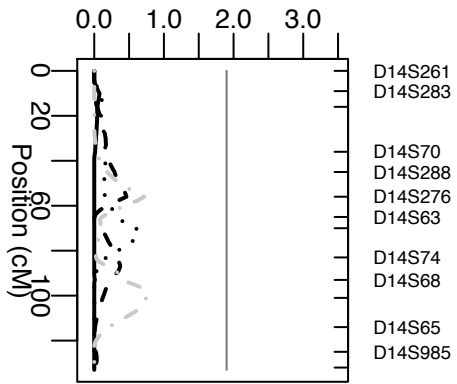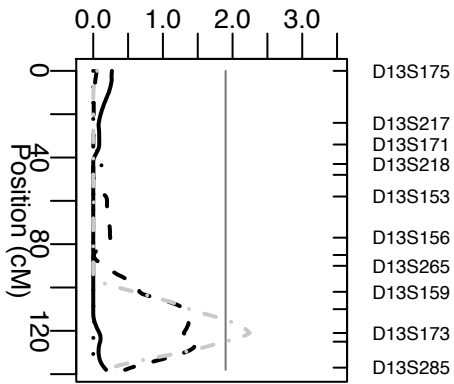

Figure S2a p.4/6

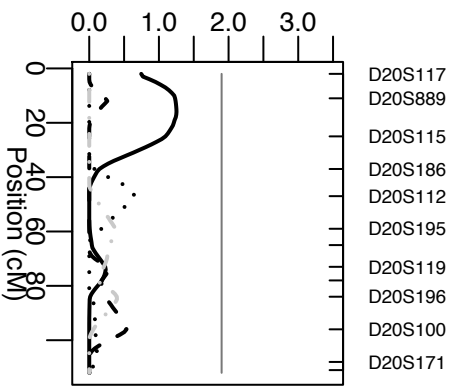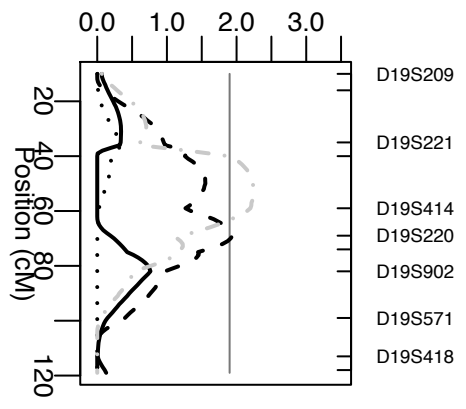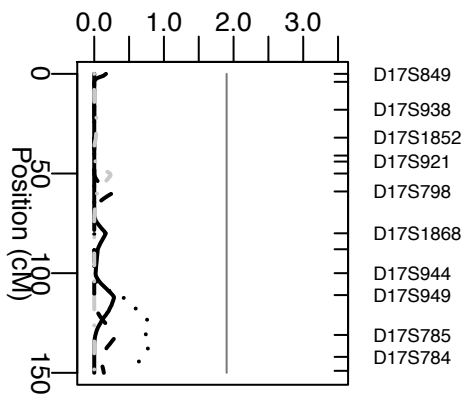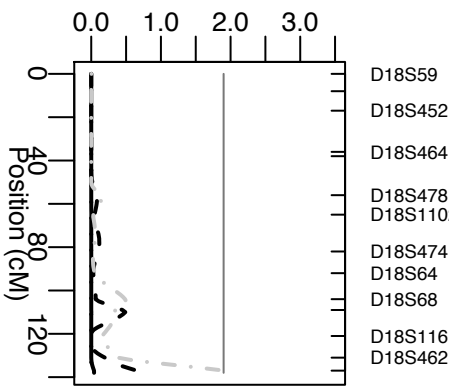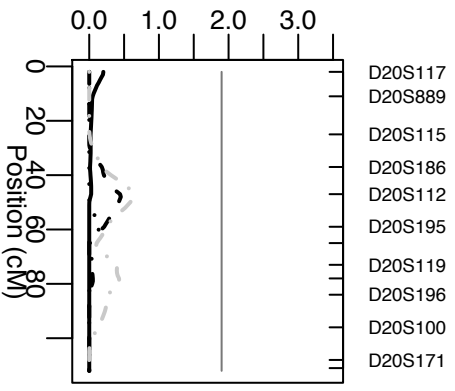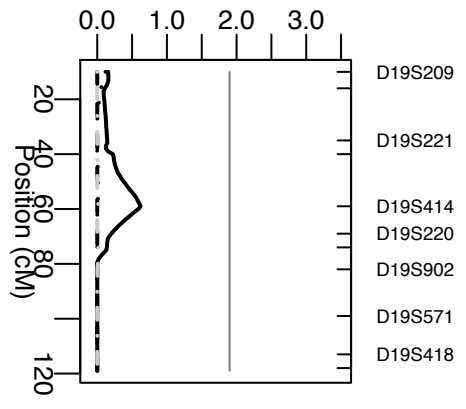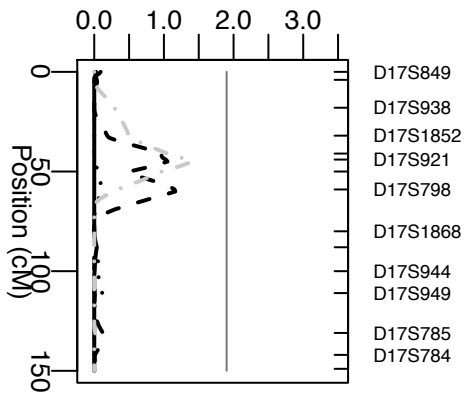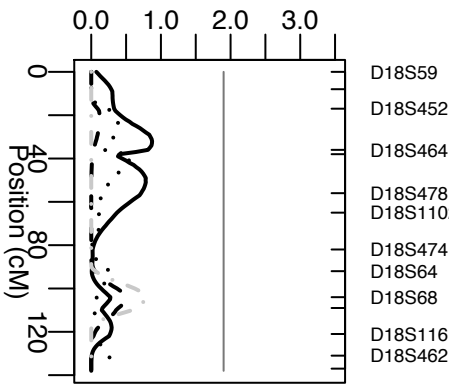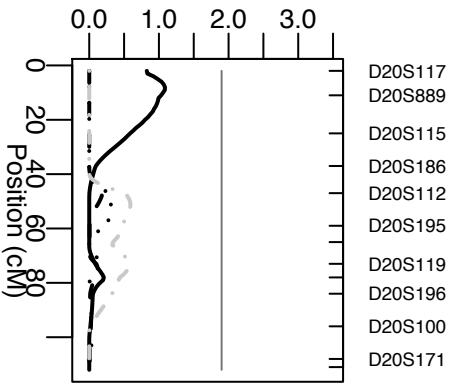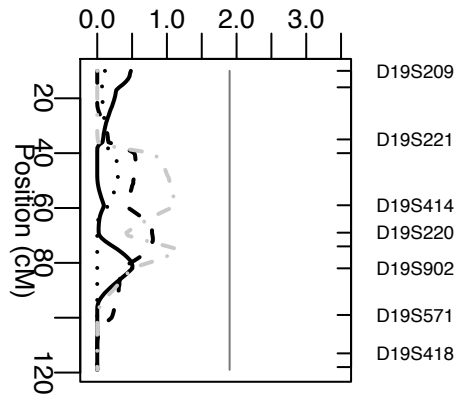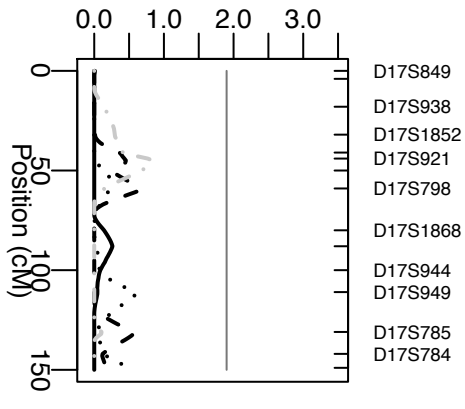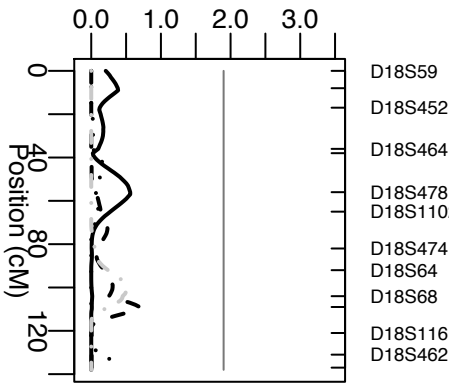

Figure S2a p. 5/6

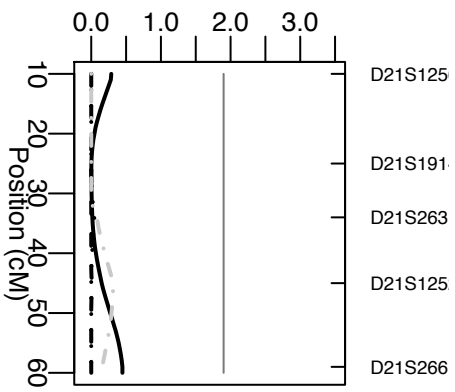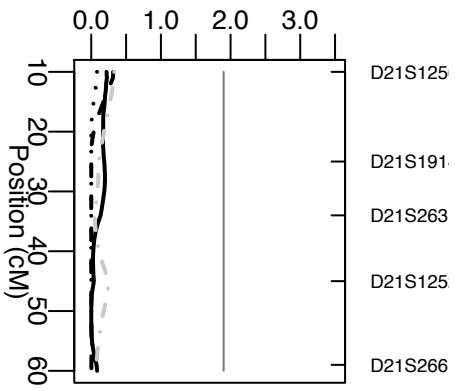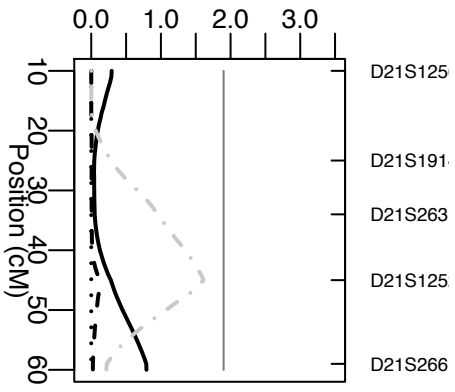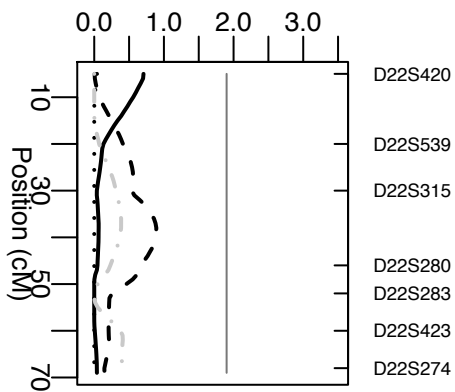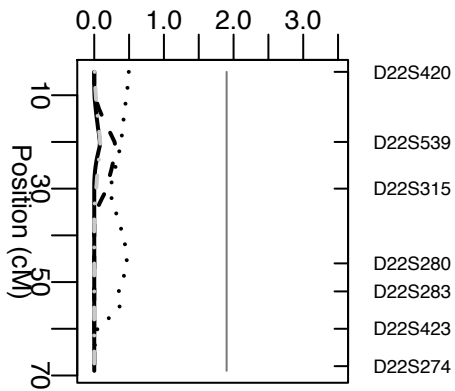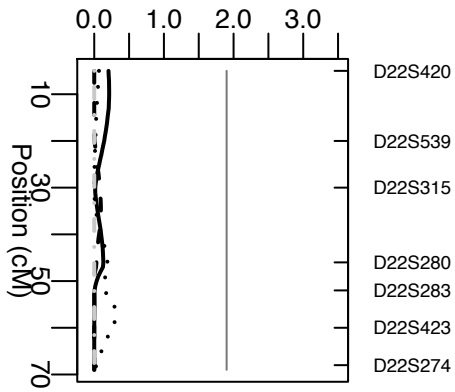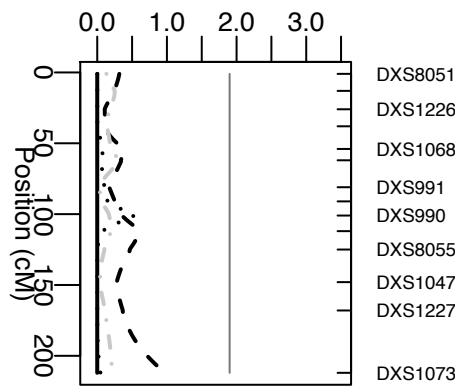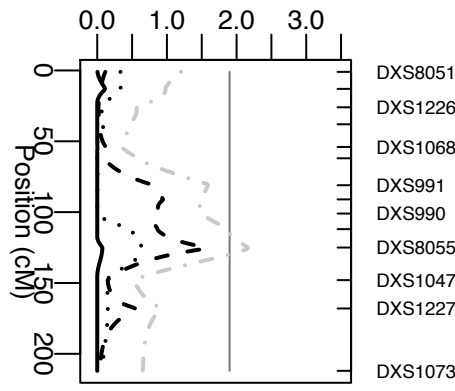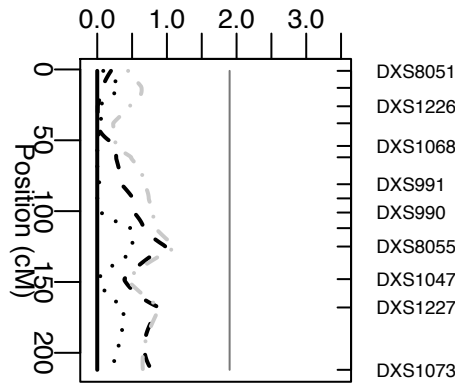

Figure S2a p. 6/6

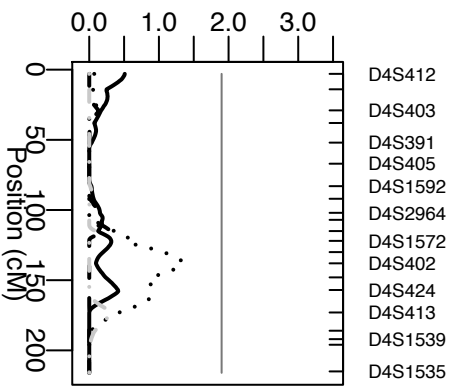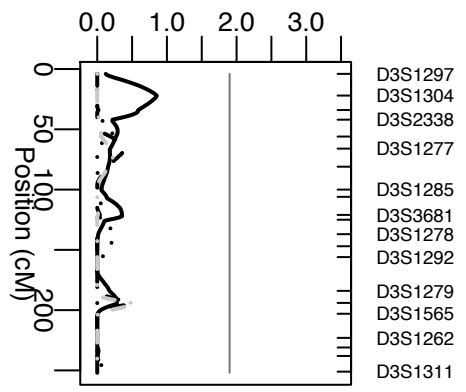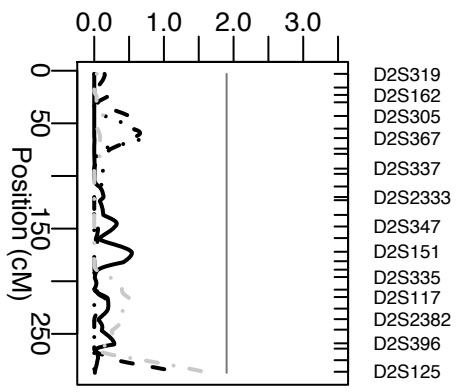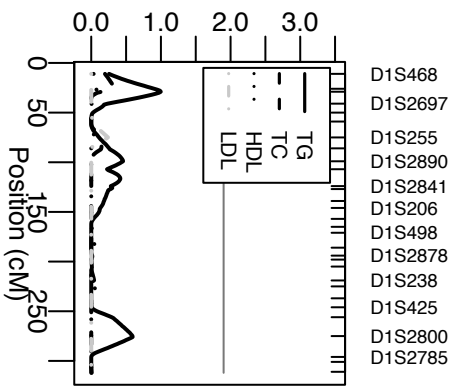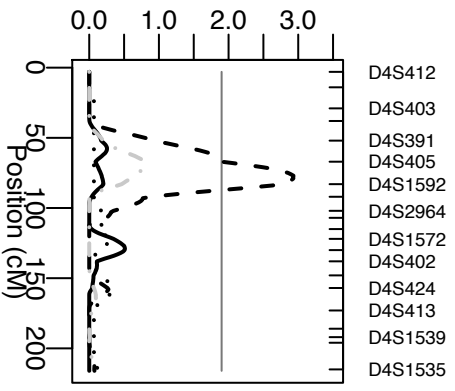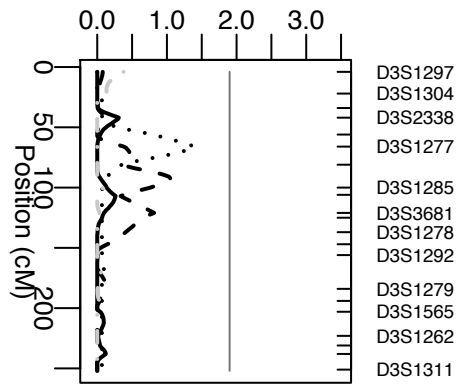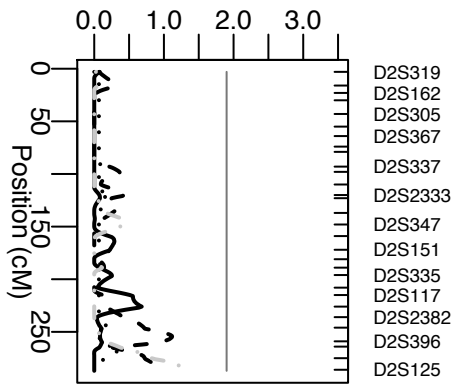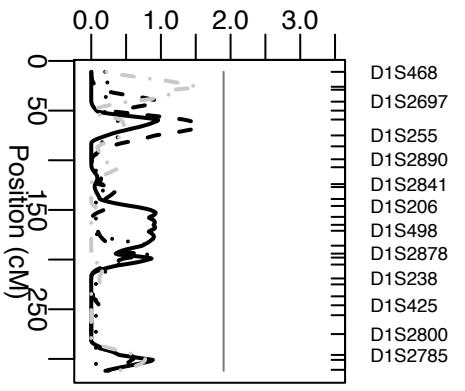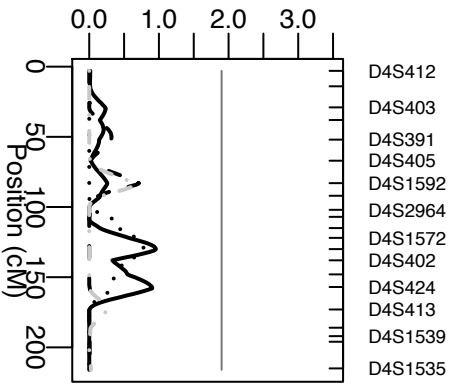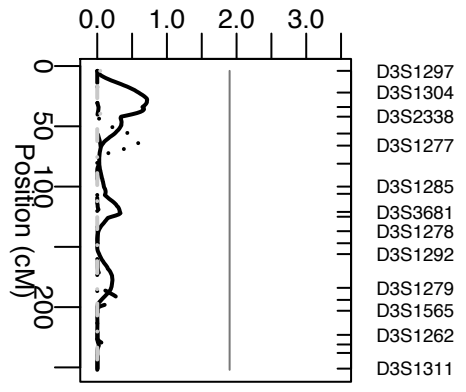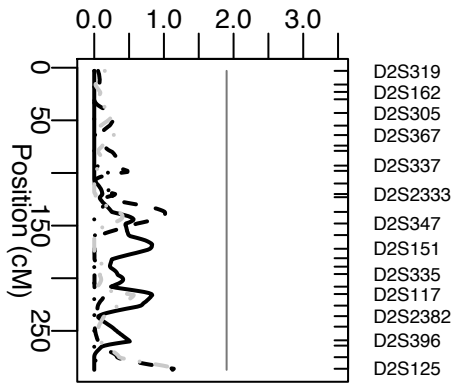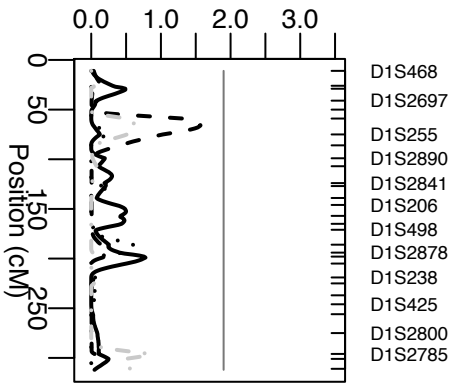

Figure S2b p. 1/6

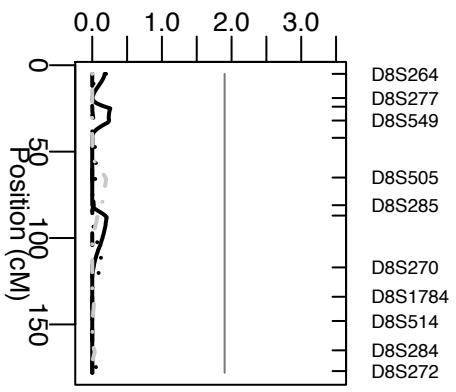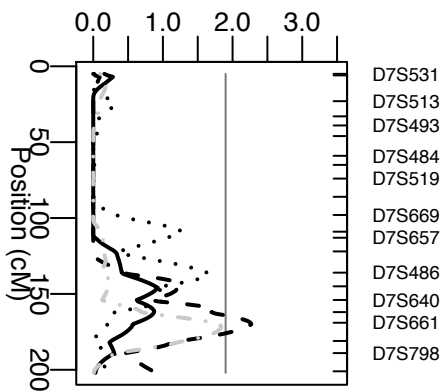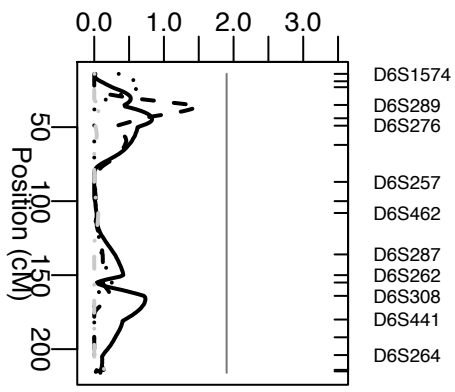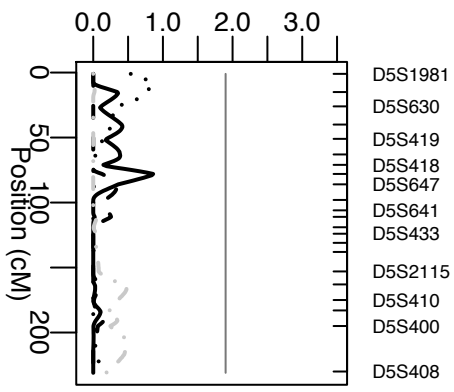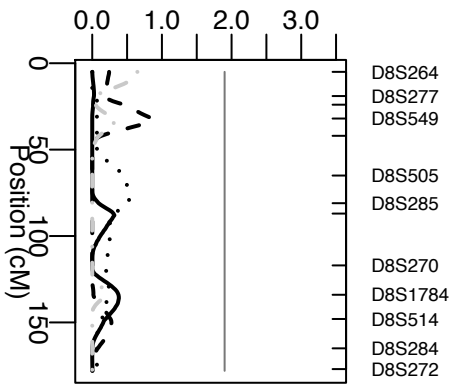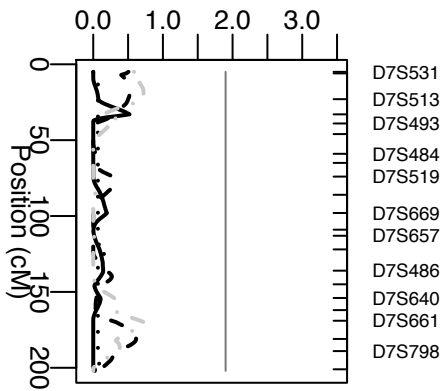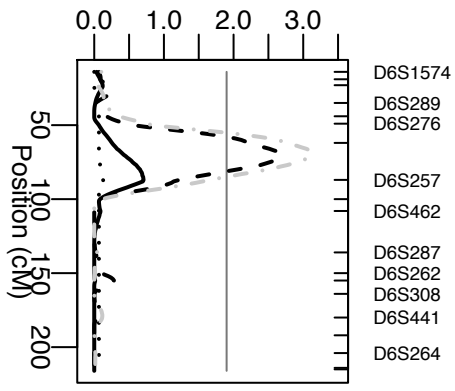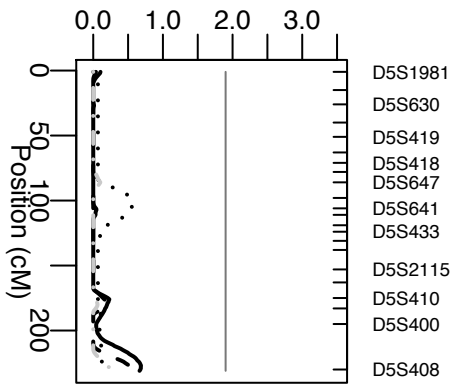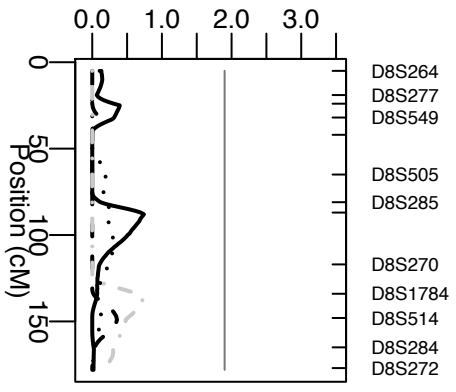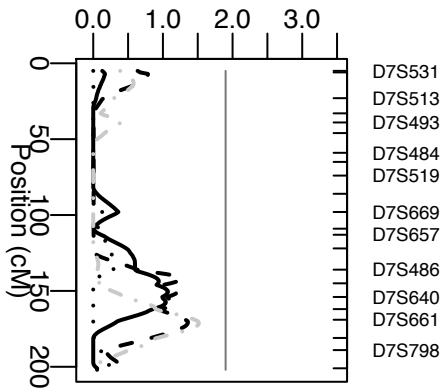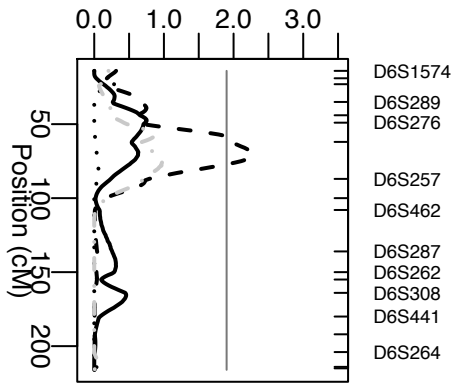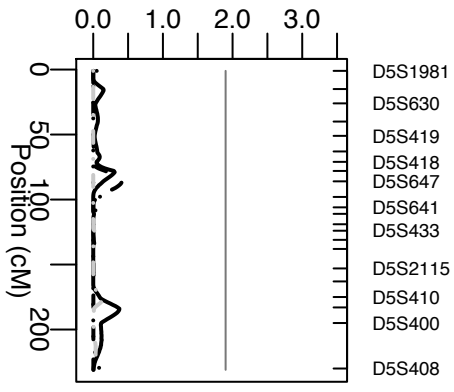

Figure S2b p. 2/6

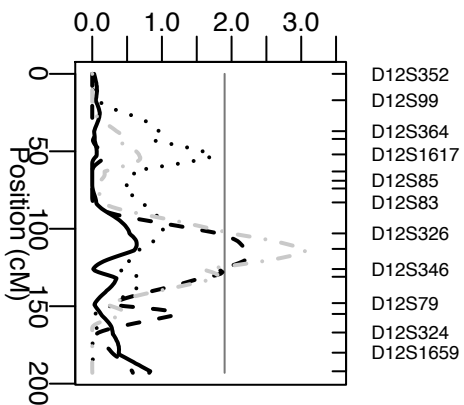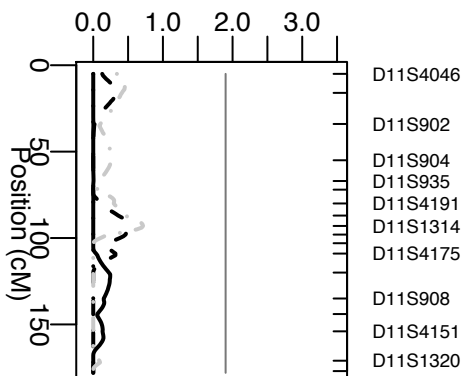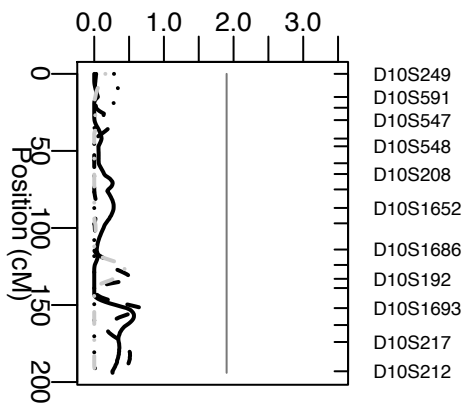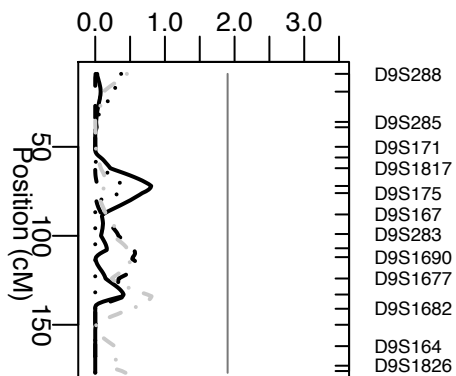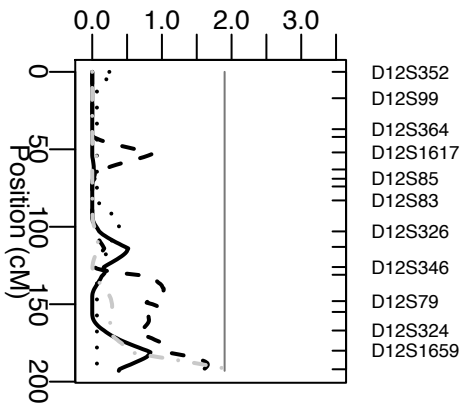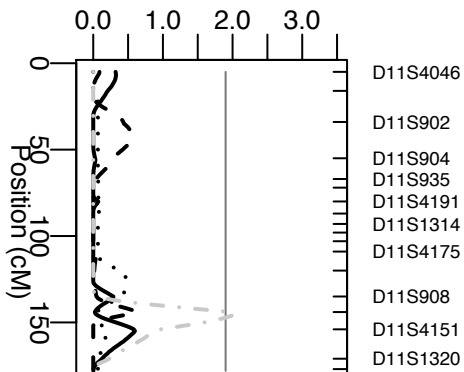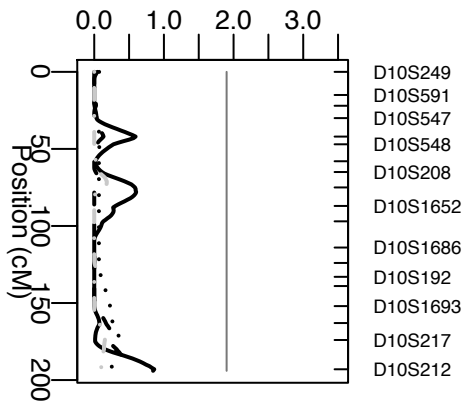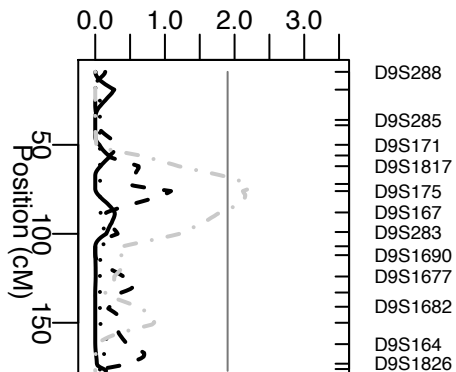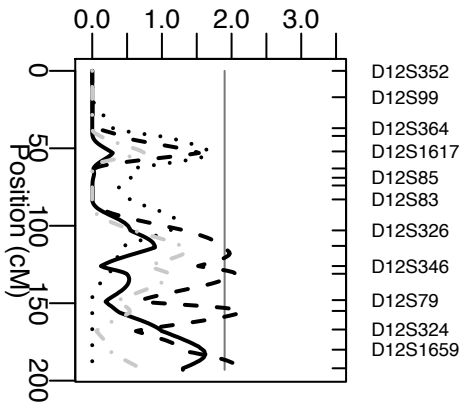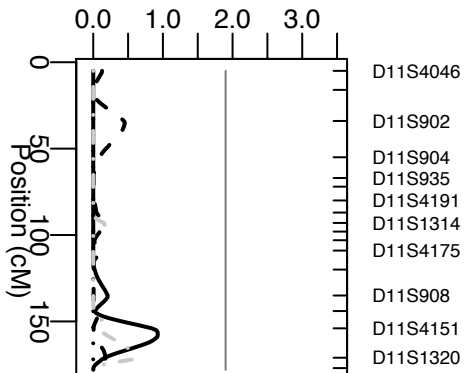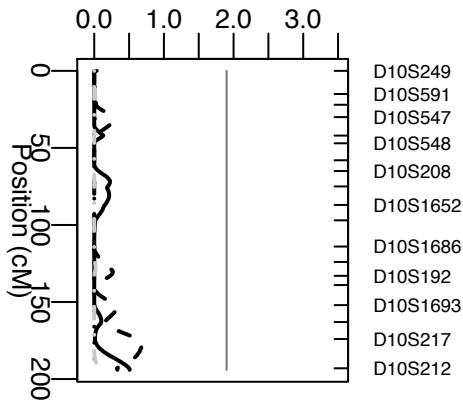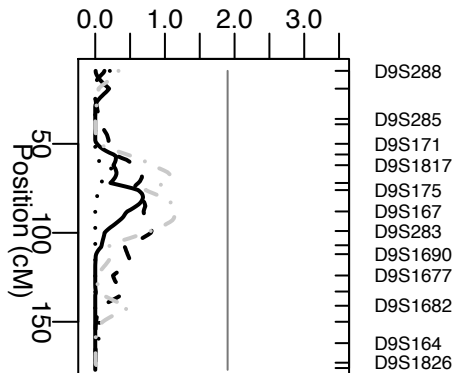

Figure S2b p.3/6

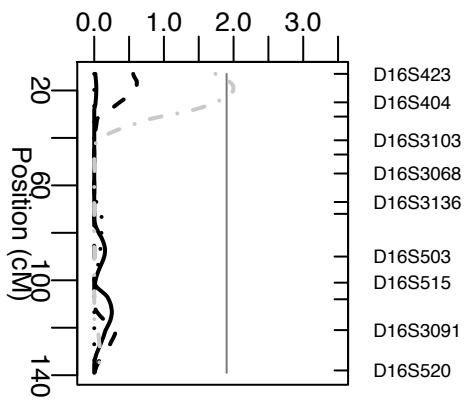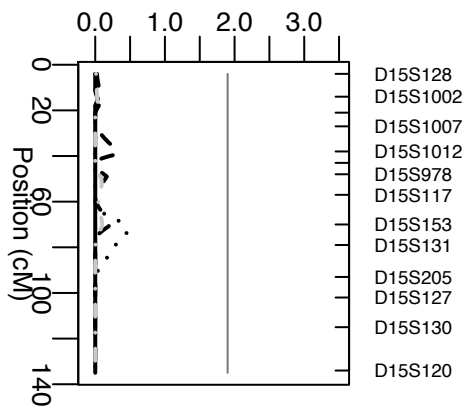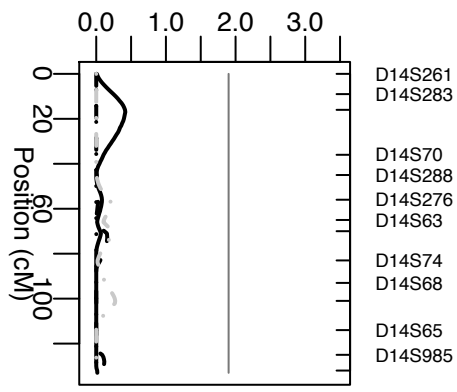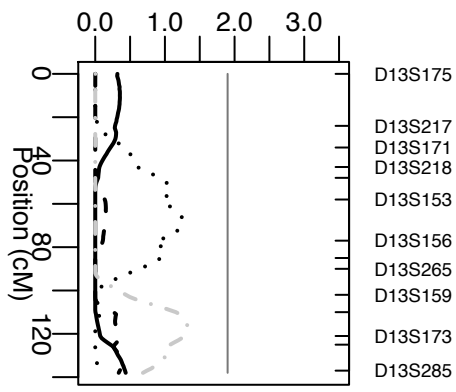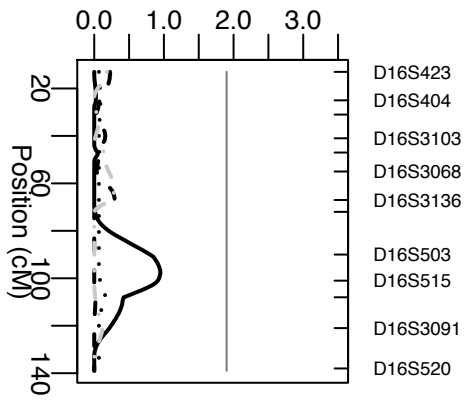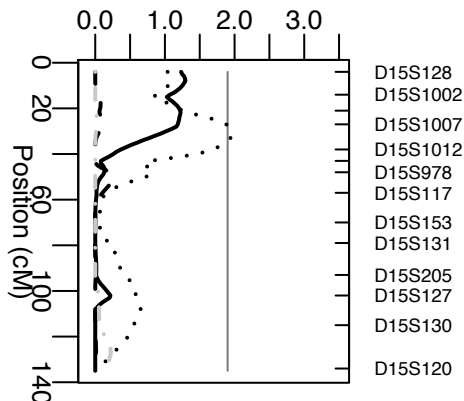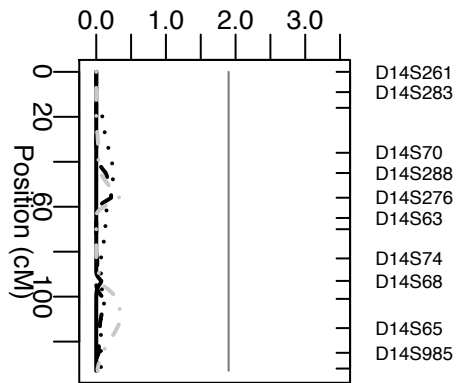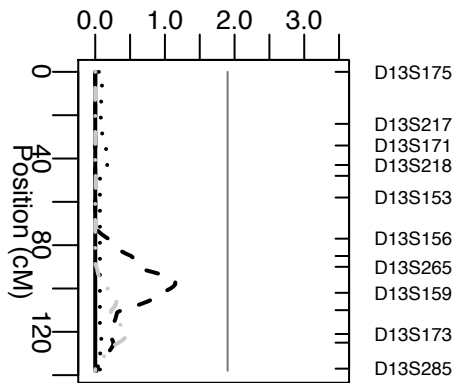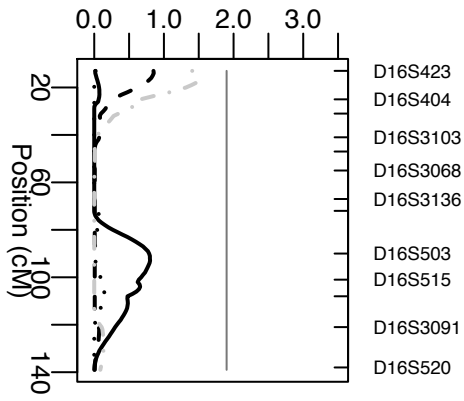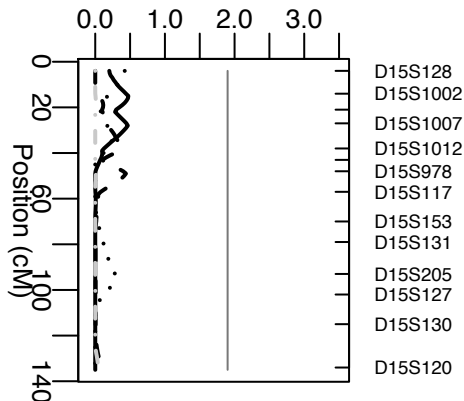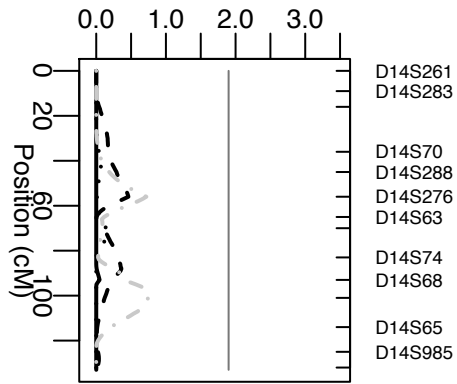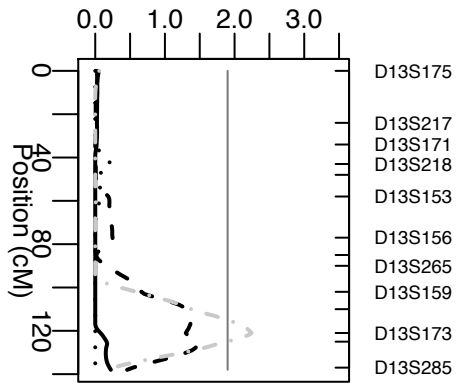

Figure S2b p. 4/6

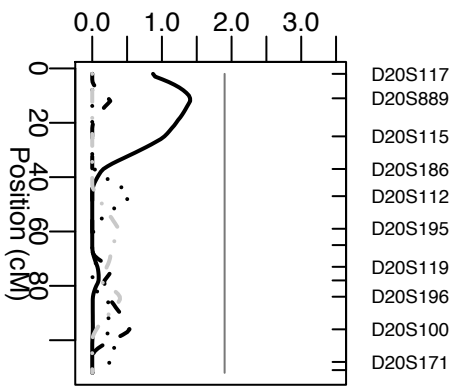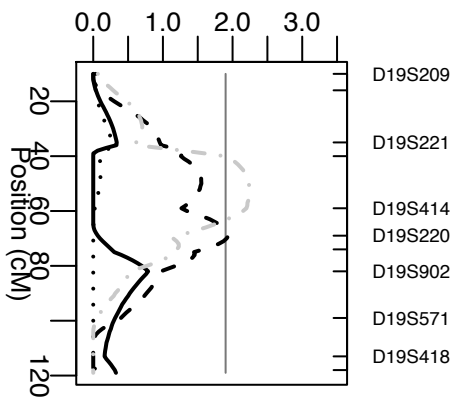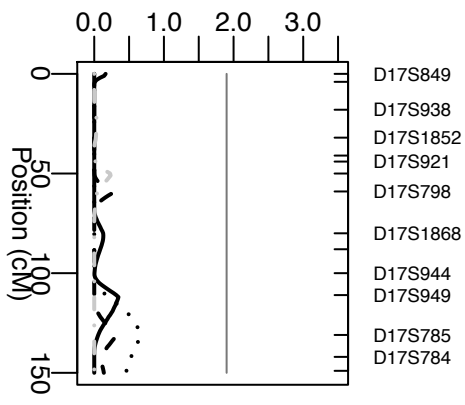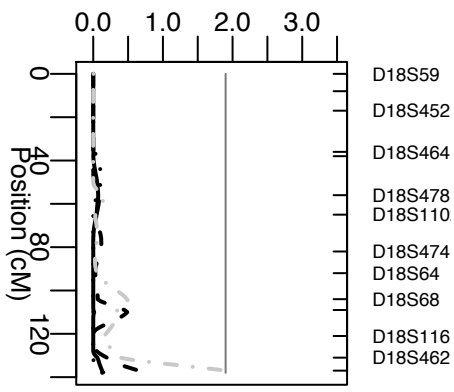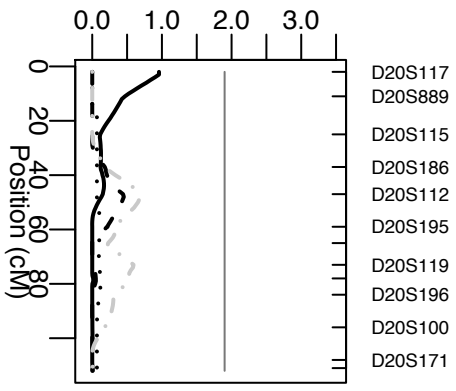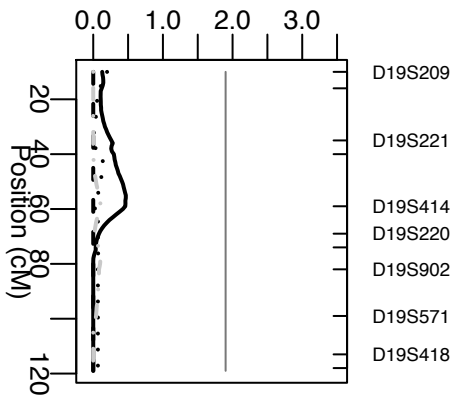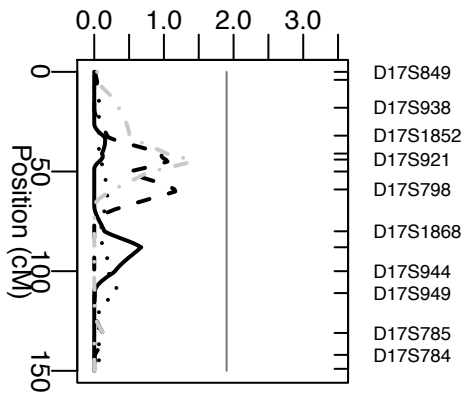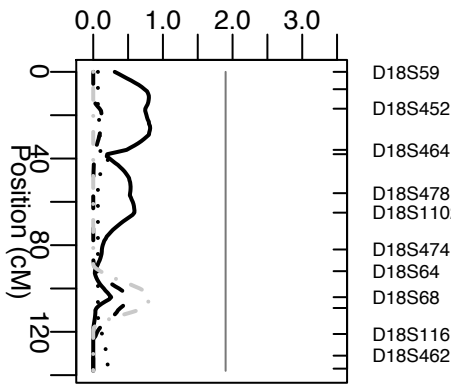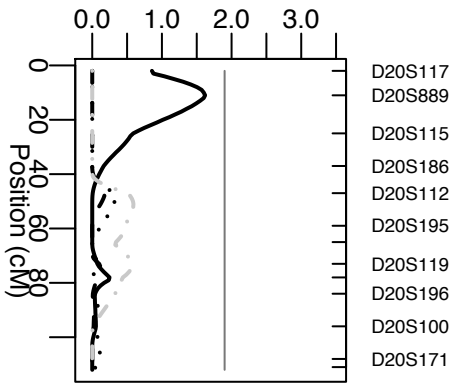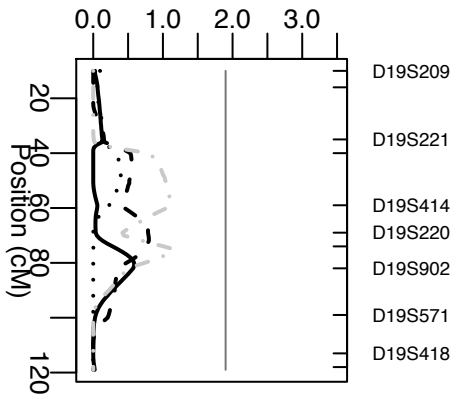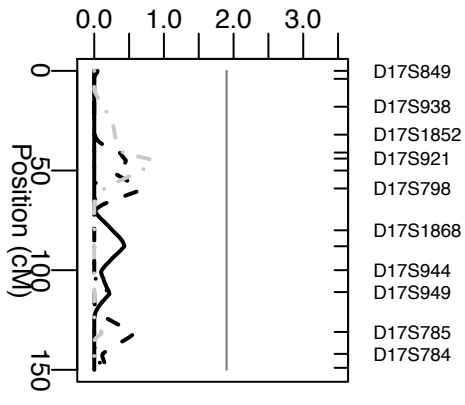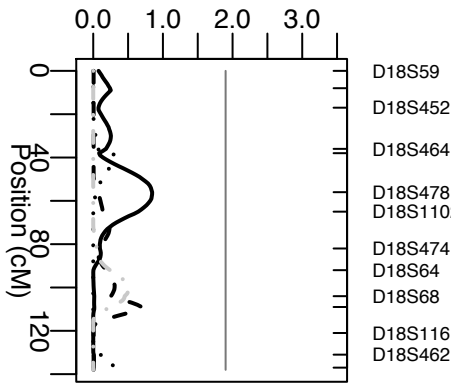

Figure S2b p. 5/6



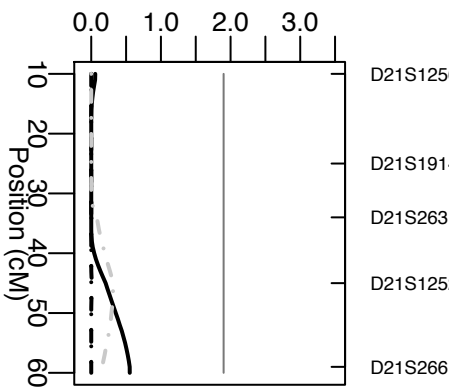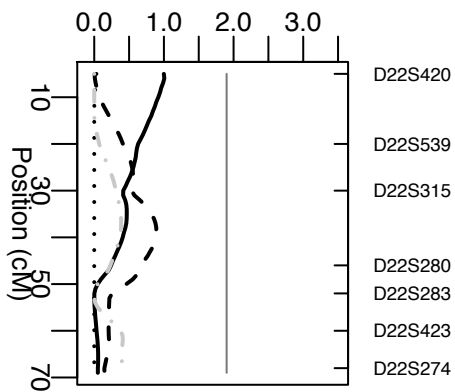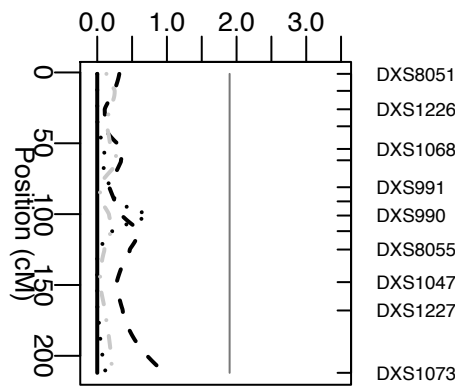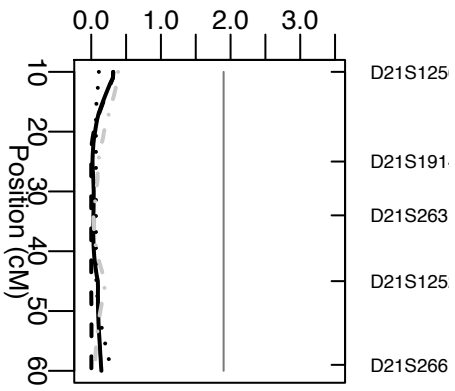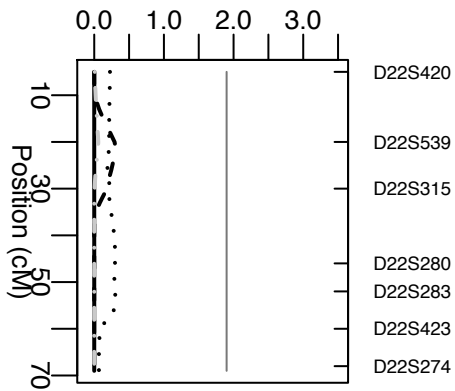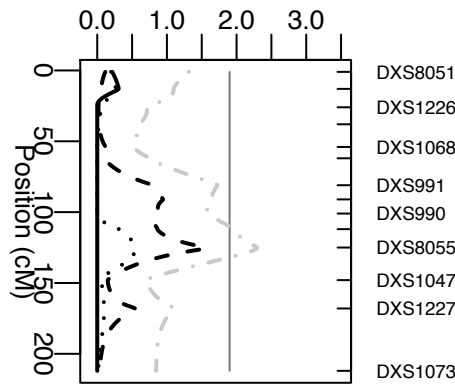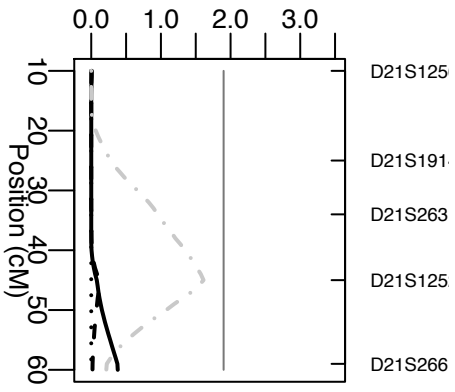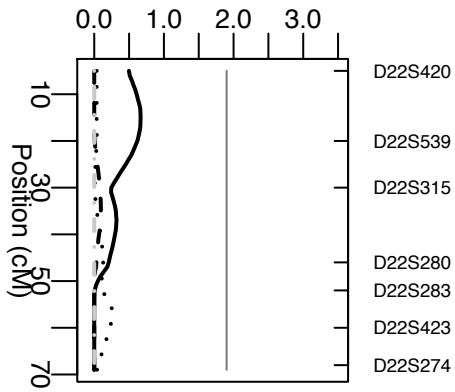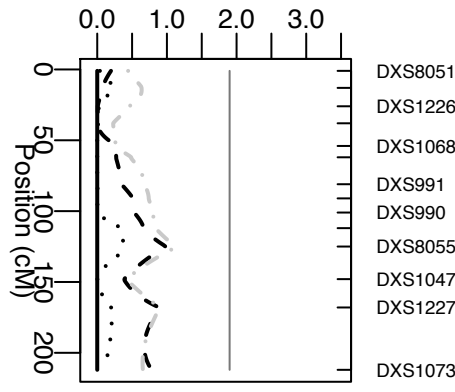

Figure S2b p. 6/6
